# Supplementary material for: Quantitatively Characterizing the Ligand Binding Mechanisms of Choline Binding Protein Using Markov State Model Analysis
Source: PubMed Central journal article supplement (PMC4125059; doi:10.1371/journal.pcbi.1003767), 2014-08-07
Supplement: pcbi.1003767.s014.pdf [file pcbi.1003767.s014.pdf]

**Table S1.**

| MFPT( $\mu$ s) | S1               | S2                | S3                | S4                | S5                |
|----------------|------------------|-------------------|-------------------|-------------------|-------------------|
| S1             |                  | 12.08 $\pm$ 11.00 | 23.93 $\pm$ 17.59 | 35.83 $\pm$ 28.28 | 40.40 $\pm$ 32.63 |
| S2             | 2.07 $\pm$ 1.01  |                   | 33.02 $\pm$ 17.10 | 20.70 $\pm$ 20.10 | 35.80 $\pm$ 22.49 |
| S3             | 2.71 $\pm$ 3.19  | 16.20 $\pm$ 9.58  |                   | 39.95 $\pm$ 28.22 | 44.69 $\pm$ 31.63 |
| S4             | 9.35 $\pm$ 10.01 | 6.15 $\pm$ 9.15   | 40.36 $\pm$ 20.26 |                   | 39.13 $\pm$ 22.16 |
| S5             | 3.15 $\pm$ 4.92  | 7.91 $\pm$ 4.36   | 32.92 $\pm$ 19.91 | 28.11 $\pm$ 20.94 |                   |
