# Supplementary material for: Quantitatively Characterizing the Ligand Binding Mechanisms of Choline Binding Protein Using Markov State Model Analysis
Source: PubMed Central journal article supplement (PMC4125059; doi:10.1371/journal.pcbi.1003767), 2014-08-07
Supplement: pcbi.1003767.s015.pdf [file pcbi.1003767.s015.pdf]

**Table S2.**

|                    | Definition #1                                  |                    | Definition #2                                  |
|--------------------|------------------------------------------------|--------------------|------------------------------------------------|
| $k_{\text{on}}^1$  | $6.33 \times 10^7 \text{ M}^{-1}\text{s}^{-1}$ | $k_{\text{on}}^1$  | $5.88 \times 10^7 \text{ M}^{-1}\text{s}^{-1}$ |
| $k_{\text{on}}^3$  | $4.19 \times 10^8 \text{ M}^{-1}\text{s}^{-1}$ | $k_{\text{on}}^3$  | $3.51 \times 10^8 \text{ M}^{-1}\text{s}^{-1}$ |
| $k_{\text{off}}^3$ | $4.50 \times 10^7 \text{ s}^{-1}$              | $k_{\text{off}}^3$ | $5.05 \times 10^7 \text{ s}^{-1}$              |
