# Supplementary material for: Quantitatively Characterizing the Ligand Binding Mechanisms of Choline Binding Protein Using Markov State Model Analysis
Source: PubMed Central journal article supplement (PMC4125059; doi:10.1371/journal.pcbi.1003767), 2014-08-07
Supplement: pcbi.1003767.s016.pdf [file pcbi.1003767.s016.pdf]

**Text S1.**

[ bondtypes ]

| ;i  | j   | func | b0      | kb       |
|-----|-----|------|---------|----------|
| CTL | CTL | 1    | 0.15350 | 253630.0 |
| CTL | OHL | 1    | 0.14260 | 262840.0 |
| CTL | H1L | 1    | 0.10930 | 281080.0 |
| CTL | N3L | 1    | 0.14990 | 245680.0 |
| CTL | HPL | 1    | 0.10910 | 283420.0 |
| OHL | HOL | 1    | 0.09740 | 309280.0 |

[ angletypes ]

| ;i  | j   | k   | func | th0      | cth      |
|-----|-----|-----|------|----------|----------|
| CTL | CTL | N3L | 1    | 114.3200 | 539.3200 |
| CTL | CTL | HPL | 1    | 111.7400 | 385.1000 |
| CTL | OHL | HOL | 1    | 108.1600 | 394.0500 |
| CTL | CTL | OHL | 1    | 109.4300 | 566.6800 |
| CTL | CTL | H1L | 1    | 110.0700 | 387.9400 |
| CTL | N3L | CTL | 1    | 110.6400 | 525.8500 |
| OHL | CTL | H1L | 1    | 109.8800 | 426.5200 |
| N3L | CTL | HPL | 1    | 107.9100 | 410.2000 |
| H1L | CTL | H1L | 1    | 109.5500 | 327.8600 |
| HPL | CTL | HPL | 1    | 110.7400 | 326.6900 |

[ dihedraltypes ]

| ;i  | j   | k   | l   | func | phase | kd       | pn |
|-----|-----|-----|-----|------|-------|----------|----|
| CTL | CTL | N3L | CTL | 9    | 0.0   | 1.77466  | 2  |
| CTL | CTL | N3L | CTL | 9    | 0.0   | 0.395553 | 3  |
| CTL | CTL | OHL | HOL | 9    | 180.0 | 2.32803  | 1  |
| CTL | CTL | OHL | HOL | 9    | 0.0   | 2.56256  | 2  |
| CTL | CTL | OHL | HOL | 9    | 0.0   | 1.44623  | 3  |
| CTL | N3L | CTL | HPL | 9    | 0.0   | 0.898473 | 3  |
| OHL | CTL | CTL | N3L | 9    | 180.0 | 4.80502  | 1  |
| OHL | CTL | CTL | N3L | 9    | 0.0   | 1.13979  | 2  |
| OHL | CTL | CTL | N3L | 9    | 0.0   | 1.65992  | 3  |
| OHL | CTL | CTL | HPL | 9    | 0.0   | 0.829962 | 3  |
| H1L | CTL | CTL | N3L | 9    | 0.0   | 0.829962 | 3  |
| H1L | CTL | CTL | HPL | 9    | 0.0   | 0.141981 | 3  |
| H1L | CTL | OHL | HOL | 9    | 0.0   | 0.723115 | 3  |
