# Supplementary material for: Quantitatively Characterizing the Ligand Binding Mechanisms of Choline Binding Protein Using Markov State Model Analysis
Source: PubMed Central journal article supplement (PMC4125059; doi:10.1371/journal.pcbi.1003767), 2014-08-07
Supplement: pcbi.1003767.s017.pdf [file pcbi.1003767.s017.pdf]

**Text S2.**

[ CHT ]

[ atoms ]

|     |     |           |    |
|-----|-----|-----------|----|
| C4  | CTL | 0.333680  | 1  |
| C5  | CTL | -0.131150 | 2  |
| N1  | N3L | 0.102004  | 3  |
| C6  | CTL | -0.405317 | 4  |
| C7  | CTL | -0.405317 | 5  |
| C8  | CTL | -0.405317 | 6  |
| O6  | OHL | -0.695328 | 7  |
| H41 | H1L | 0.002700  | 8  |
| H42 | H1L | 0.002700  | 9  |
| H51 | HPL | 0.155329  | 10 |
| H52 | HPL | 0.155329  | 11 |
| H61 | HPL | 0.202032  | 12 |
| H62 | HPL | 0.202032  | 13 |
| H63 | HPL | 0.202032  | 14 |
| H71 | HPL | 0.202032  | 15 |
| H72 | HPL | 0.202032  | 16 |
| H73 | HPL | 0.202032  | 17 |
| H81 | HPL | 0.202032  | 18 |
| H82 | HPL | 0.202032  | 19 |
| H83 | HPL | 0.202032  | 20 |
| H6  | HOL | 0.472397  | 21 |

[ bonds ]

|    |     |
|----|-----|
| C4 | C5  |
| C4 | O6  |
| C4 | H41 |
| C4 | H42 |
| C5 | N1  |
| C5 | H51 |
| C5 | H52 |
| N1 | C6  |
| N1 | C7  |
| N1 | C8  |
| C6 | H61 |
| C6 | H62 |
| C6 | H63 |
| C7 | H71 |
| C7 | H72 |
| C7 | H73 |
| C8 | H81 |
| C8 | H82 |
| C8 | H83 |
| O6 | H6  |
